# Supplementary material
Source: publisher figshare collection journal article supplement (https://tandf.figshare.com/ndownloader/files/22514663)
Supplement: Supplementary file 1 [file 22514663]

# Structural development of the Hastings Block and tectonic implications for the southern New England Orogen

J. Yan<sup>a,b,c\*</sup> and P. G. Lennox<sup>b</sup>

<sup>a</sup> State Key Laboratory of Nuclear Resources and Environment, East China University of Technology, Nanchang, Jiangxi 330013, China; <sup>b</sup> School of Biological, Earth and Environmental Sciences, The University of New South Wales, Sydney, NSW 2052, Australia; <sup>c</sup> School of Earth Sciences and Resources, China University of Geosciences, Beijing, 100083, China

\*J. Yan [656907470@qq.com](mailto:656907470@qq.com)

Editorial handling: Chris Fergusson

Received 17 May 2019; accepted 18 December 2019

## SUPPLEMENTARY PAPERS

*Australian Journal of Earth Sciences* (2020) 67(5), 681–698. <https://doi.org/10.1080/08120099.2020.1711451>

Copies of Supplementary Papers may be obtained from the Geological Society of Australia's website ([www.gsa.org.au](http://www.gsa.org.au)), the Australian Journal of Earth Sciences website ([www.ajes.com.au](http://www.ajes.com.au)) or from the National Library of Australia's Pandora archive (<https://pandora.nla.gov.au/tep/150555>).

### Supplementary papers

- Figure A1. The map showing the gravity worms for the southern New England Orogen covered by geological map (dataset is from the Geological Survey of NSW). Red box highlights the Hastings Block.
- Figure A2. Fault Block A. (a) Location of the block on the eastern limb of the Parrabel Dome; (b) schematic map with observed bedding reading (red readings were used in the modelling) and (c) bottom 3D surface of the Mingaletta Formation in this block.
- Figure A3. Fault block B. (a) Locality map showing the position of the fault block; (b) 3D map of the bottom surfaces of the Major Creeks and Kullatine formations in this block; and (c) schematic map with observed bedding reading.
- Figure A4. Map pattern of the Yessabah Limestone in the Fault Block B. (a) Three exposures of the Yessabah Limestone as interpreted by Jeffery (1986); and (b) two exposures of the Yessabah Limestone as proposed by Bourke (1971).
- Figure A5. Fault Block C. (a) Locality map showing the position of the fault block; (b) schematic map with observed bedding reading (red readings were used in the modelling); and (c) bottom surfaces of the Majors Creek Formation in this block.
- Figure A6. Fault Block D. (a) Locality map. (b) Detailed map of the faulting and bedding readings within the various formations in this block. The red bedding symbols were the readings used in the generation of the computer surfaces for the formations. (c) 3D model of the formations in the fault block.
- Figure A7. Fault Block E. (a) Locality map, (b) detailed map of the faulting and bedding readings within the various formations, the red symbols were readings used in the generation of the surfaces, and (c) 3D model of the formations in the fault block.
- Figure A8. Fault Block F. (a) Locality map, (b) detailed map of the faulting and bedding readings within the various formations, the blue symbols were readings used in the generation of the surfaces, and (c) 3D model of the formations in the fault block.
- Figure A9. Fault Block G. (a) Locality map, (b) detailed map of the faulting and bedding readings within the various formations, the red symbols were readings used in the generation of the surfaces, and (c) 3D model of the formations in the fault block with the top down and inclined top down views.
- Figure A10. Fault Block H. (a) Locality map, (b) detailed map of the faulting and bedding readings within the various formations in this block, the red symbols were readings used in the generation of the computer surfaces for the formations, and (c) 3D model of base of the formations in the fault block.
- Figure A11. Fault Block I. (a) Locality map, (b) detailed map of the faulting and bedding readings within the various formations in this block, the red symbols were readings used in the generation of the computer surfaces for the formations, and (c) 3D model of base of the formations in the fault block.
- Figure A12. Fault Block J. (a) Locality map, (b) detailed map of the faulting and bedding readings within the various formations, the red symbols were readings used in the generation of the surfaces, and (c) 3D model of the formations in the fault block.
- Figure A13. Fault Block K. (a) Locality map. (b) Detailed map of the faulting and bedding readings within the various formations in this block. The red bedding symbols were the readings used in the generation of the computer surfaces for the formations. (c) 3D model of the formations in the fault block.

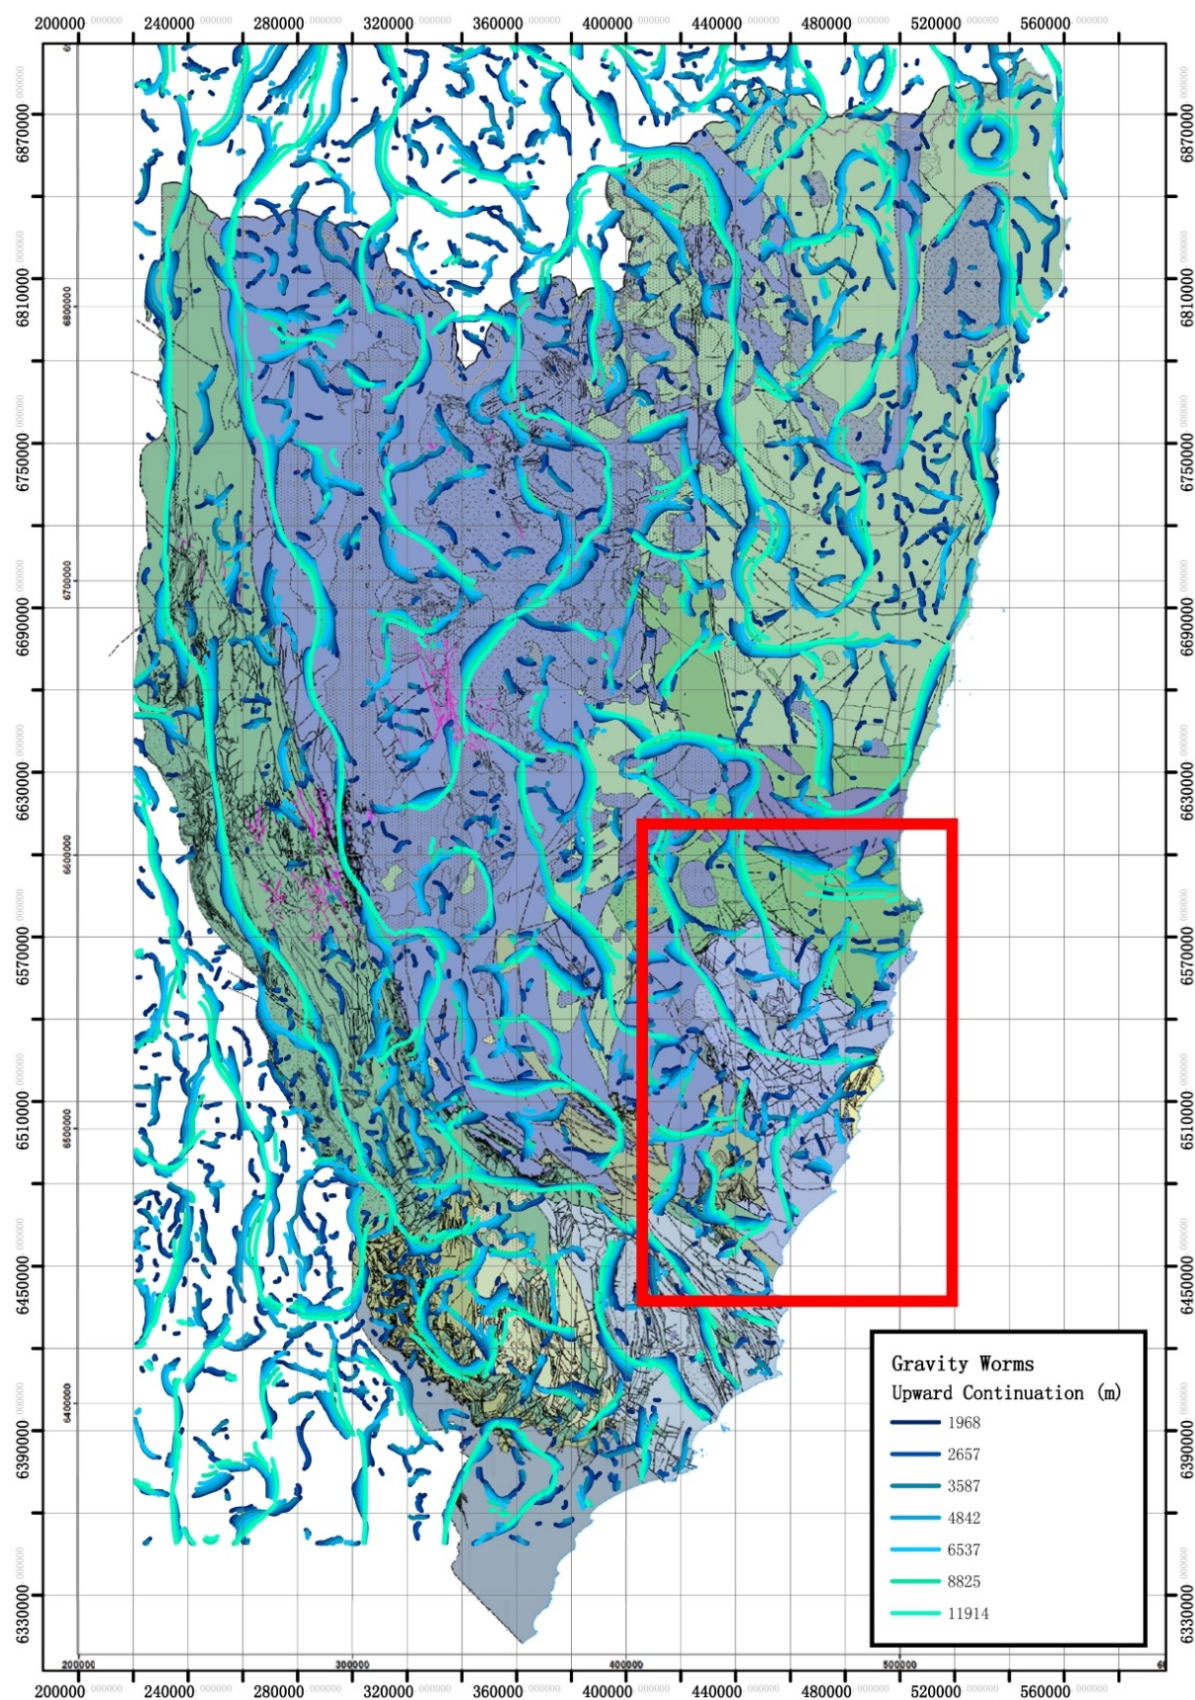

Figure A1. The map showing the gravity worms for the southern New England Orogen covered by geological map (dataset is from the Geological Survey of NSW). Red box highlights the Hastings Block.



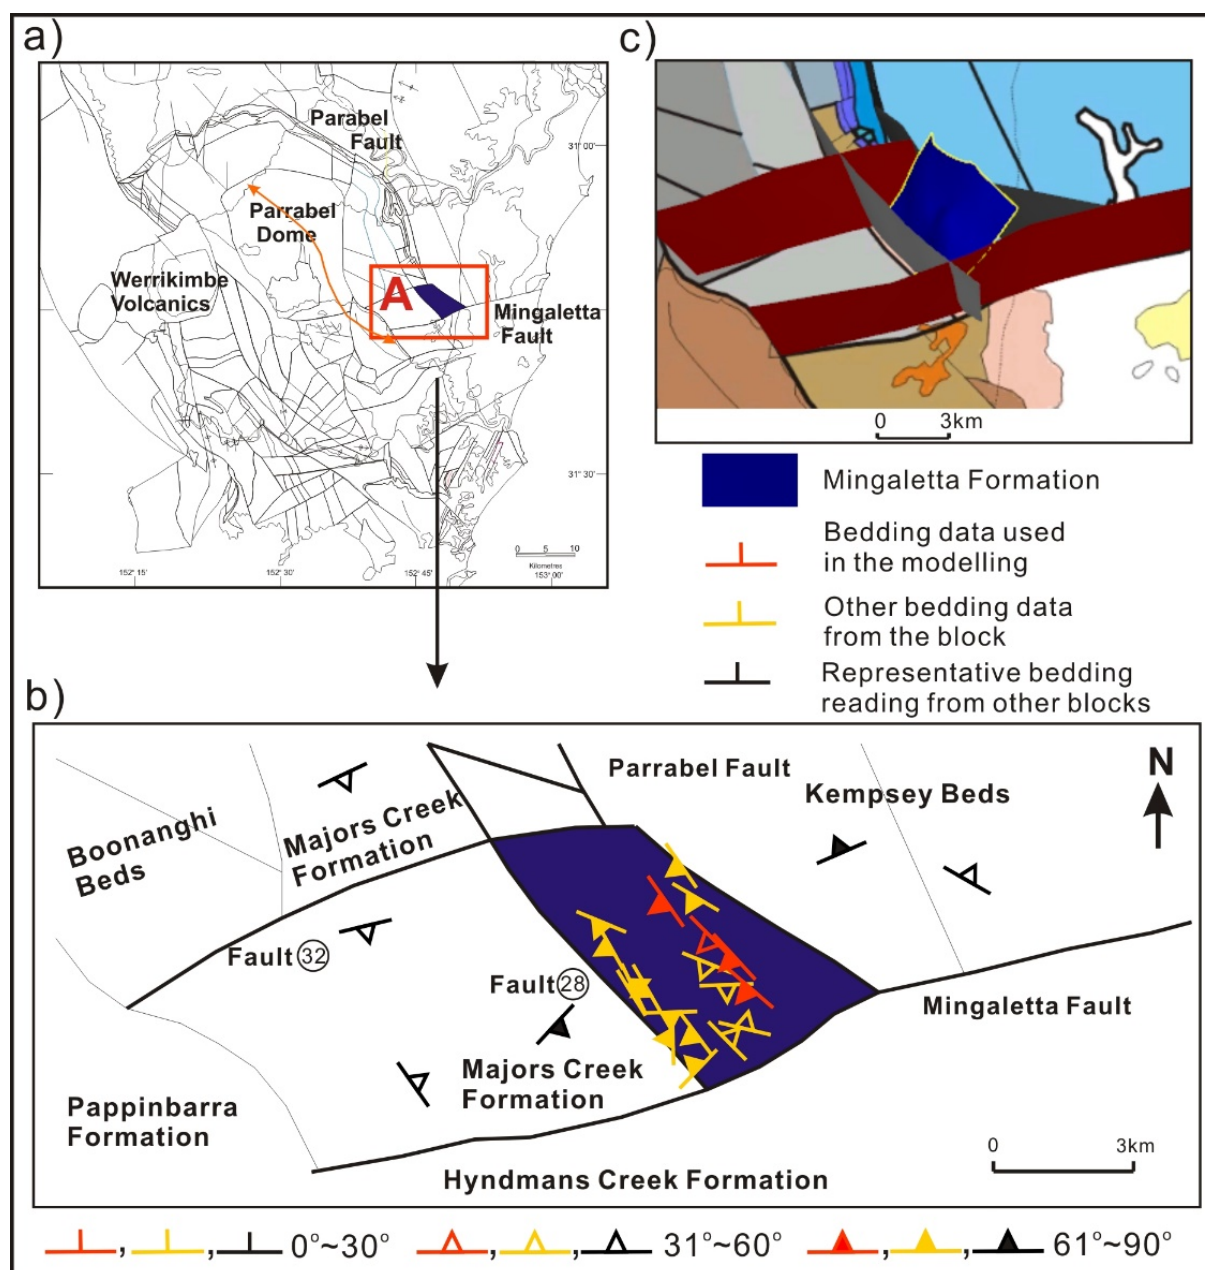

Figure A2. Fault Block A. (a) Location of the block on the eastern limb of the Parrabel Dome; (b) schematic map with observed bedding reading (red readings were used in the modelling) and (c) bottom 3D surface of the Mingaletta Formation in this block.

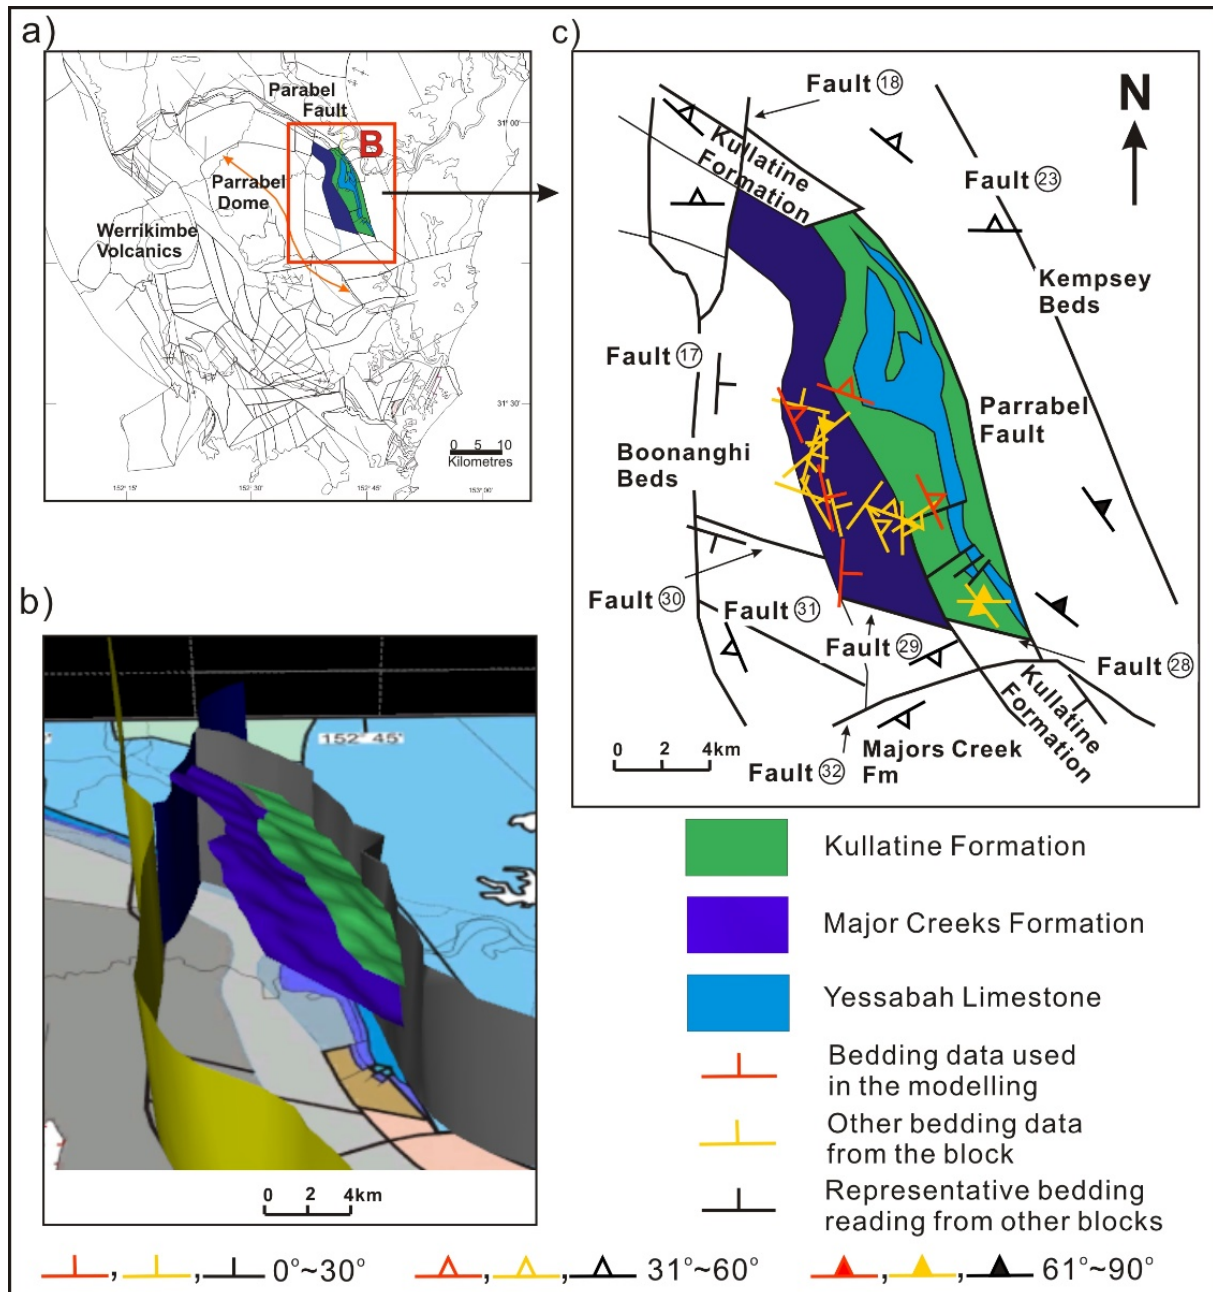

Figure A3. Fault block B. (a) Locality map showing the position of the fault block; (b) 3D map of the bottom surfaces of the Major Creeks and Kullatine formations in this block; and (c) schematic map with observed bedding reading.

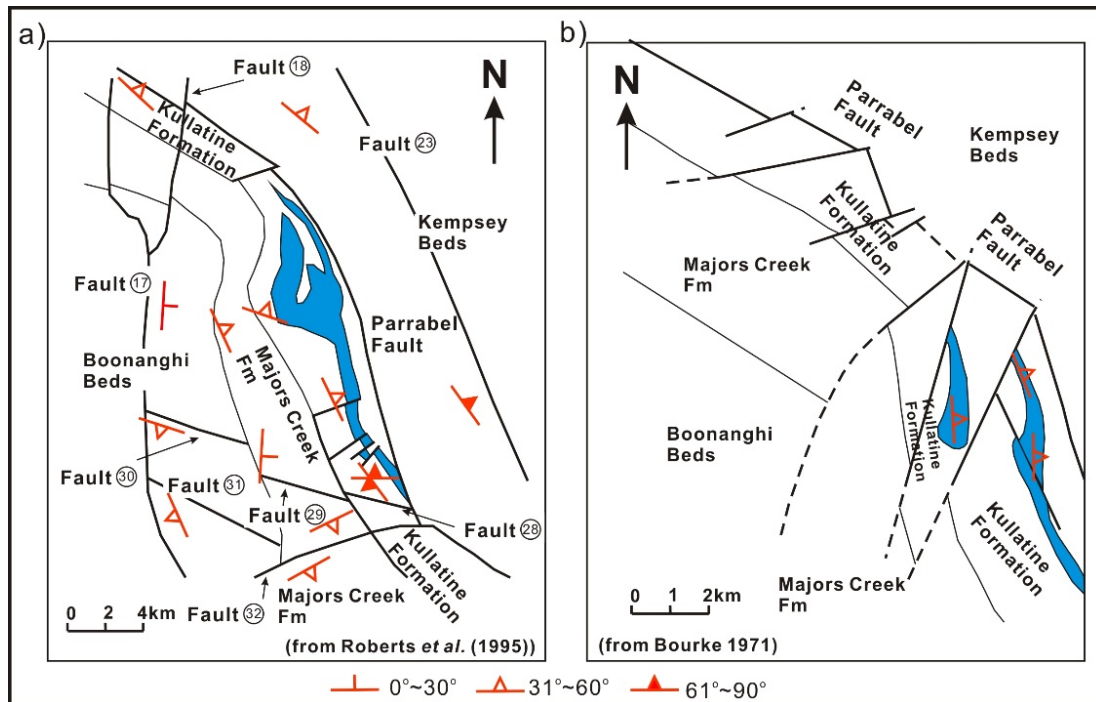

Figure A4. Map pattern of the Yessabah Limestone in the Fault Block B. (a) Three exposures of the Yessabah Limestone as interpreted by Jeffery (1986); and (b) two exposures of the Yessabah Limestone as proposed by Bourke (1971).

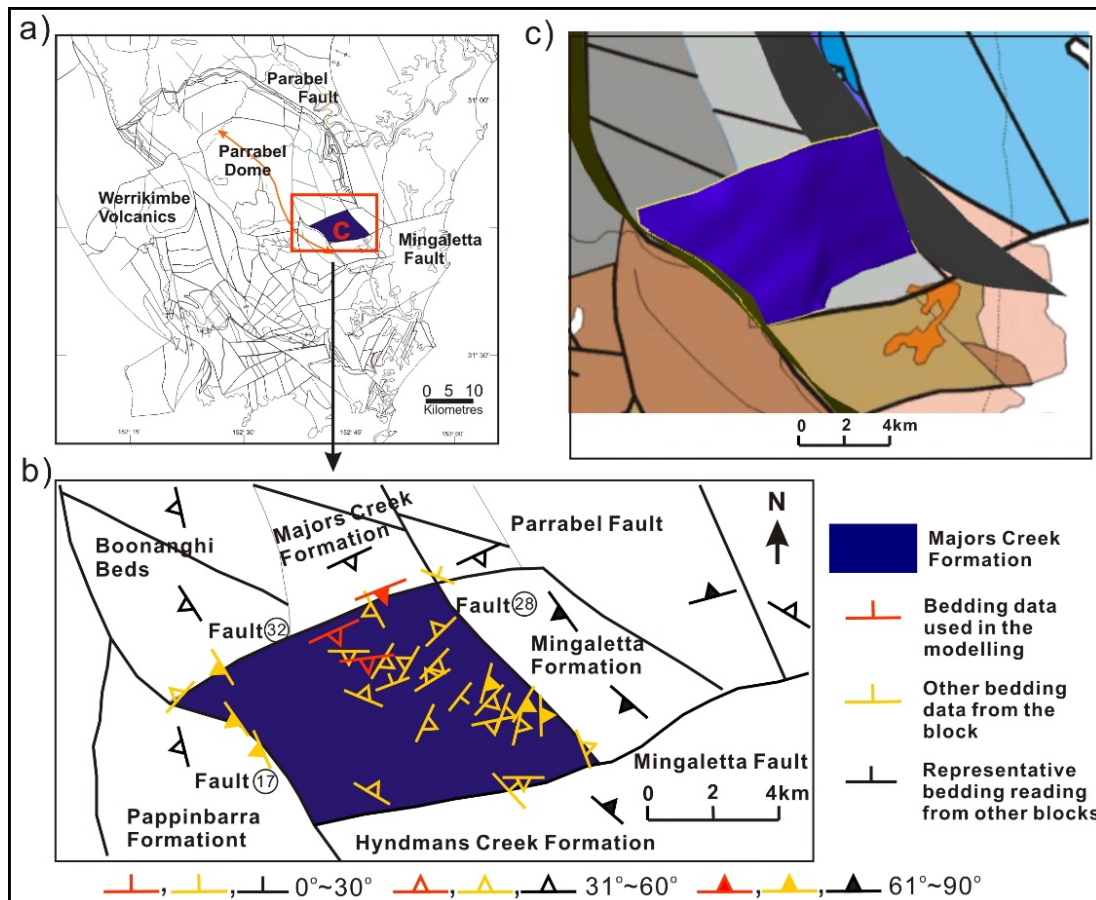

Figure A5. Fault Block C. (a) Locality map showing the position of the fault block; (b) schematic map with observed bedding reading (red readings were used in the modelling); and (c) bottom surfaces of the Majors Creek Formation in this block.



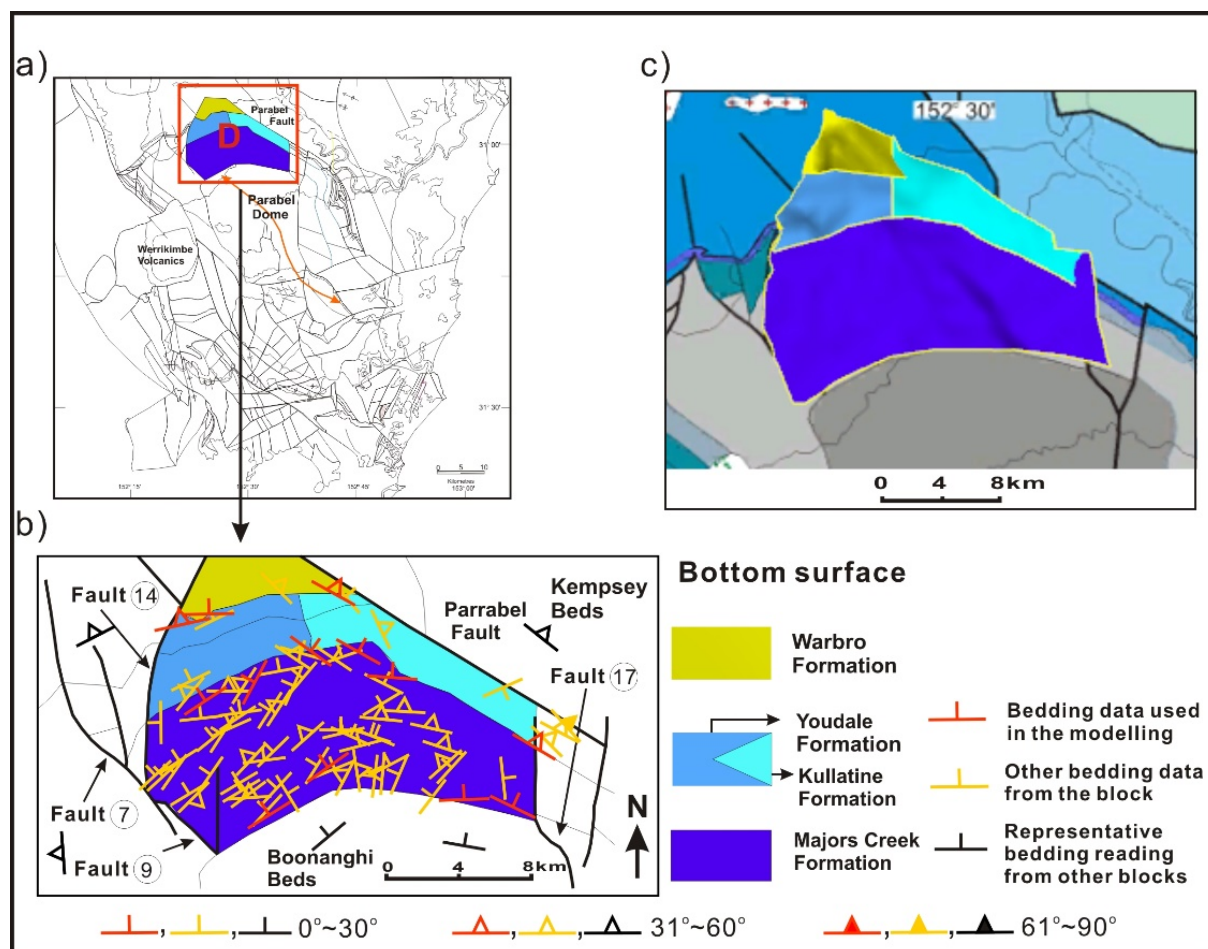

Figure A6. Fault Block D. (a) Locality map. (b) Detailed map of the faulting and bedding readings within the various formations in this block. The red bedding symbols were the readings used in the generation of the computer surfaces for the formations. (c) 3D model of the formations in the fault block.

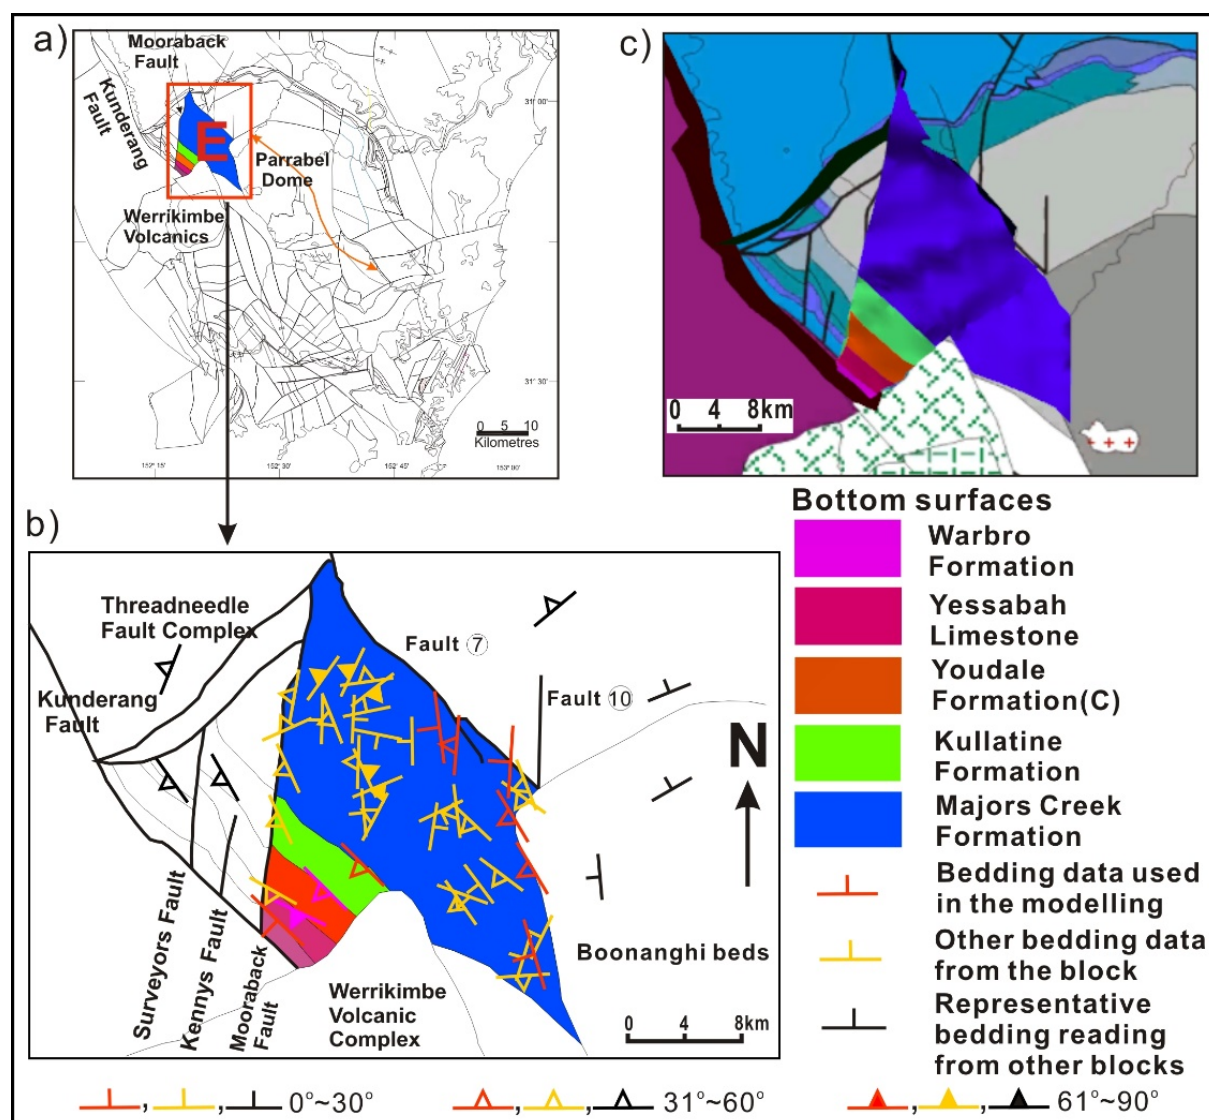

Figure A7. Fault Block E. (a) Locality map, (b) detailed map of the faulting and bedding readings within the various formations, the red symbols were readings used in the generation of the surfaces, and (c) 3D model of the formations in the fault block.

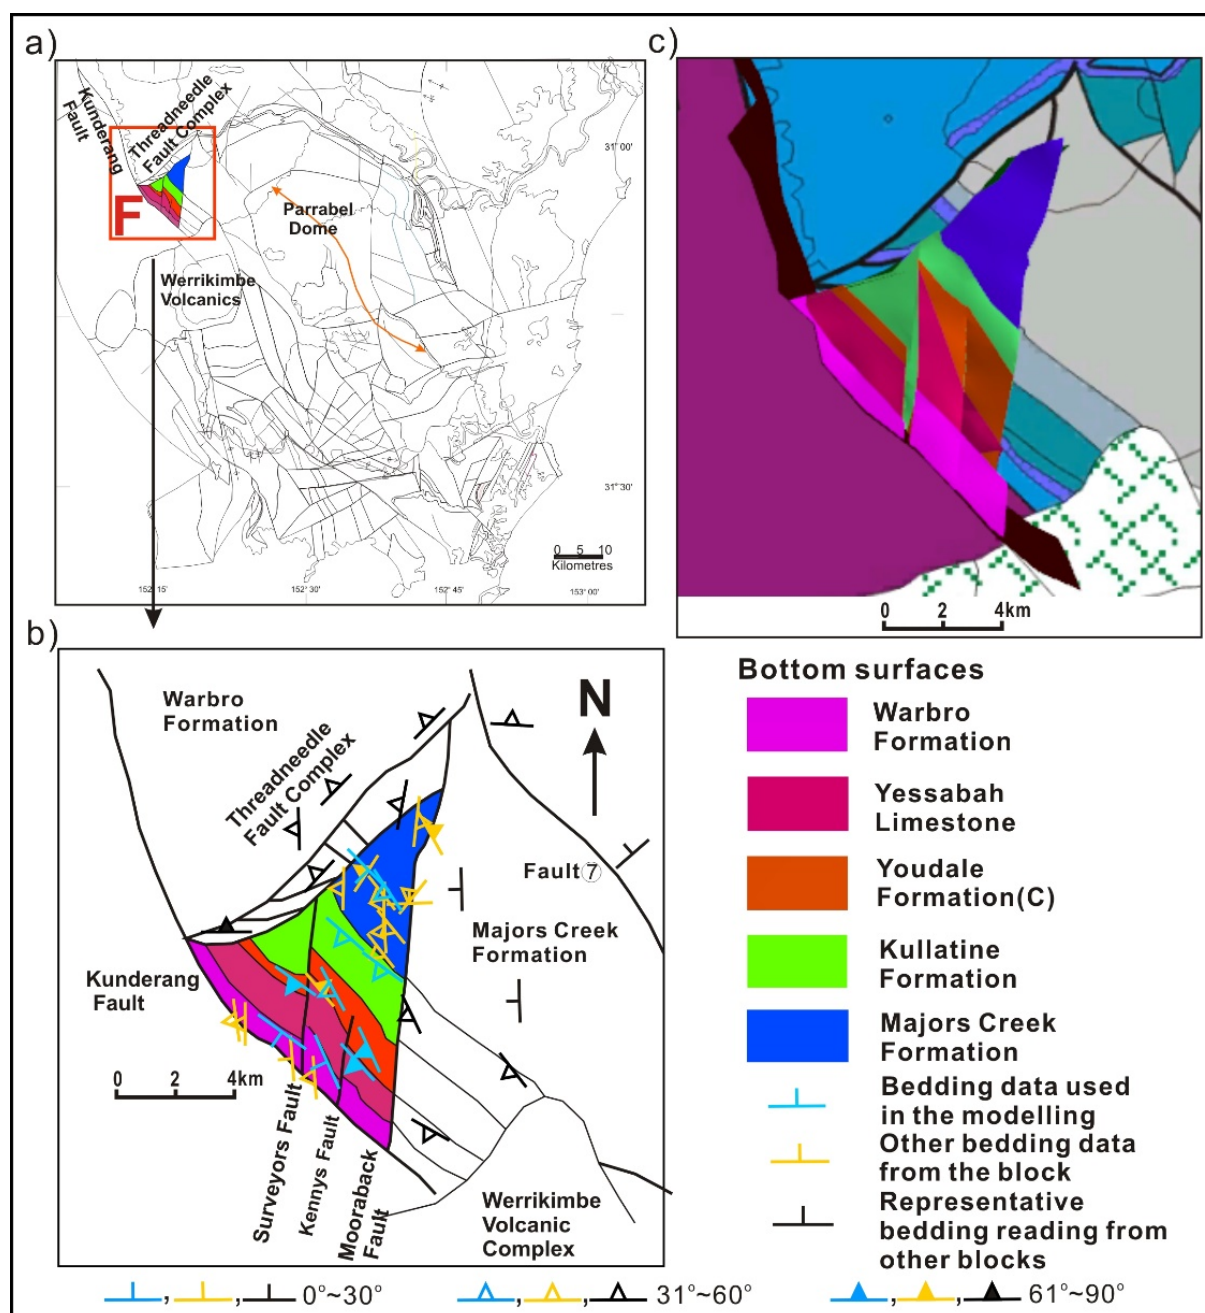

Figure A8. Fault Block F. (a) Locality map, (b) detailed map of the faulting and bedding readings within the various formations, the blue symbols were readings used in the generation of the surfaces, and (c) 3D model of the formations in the fault block.



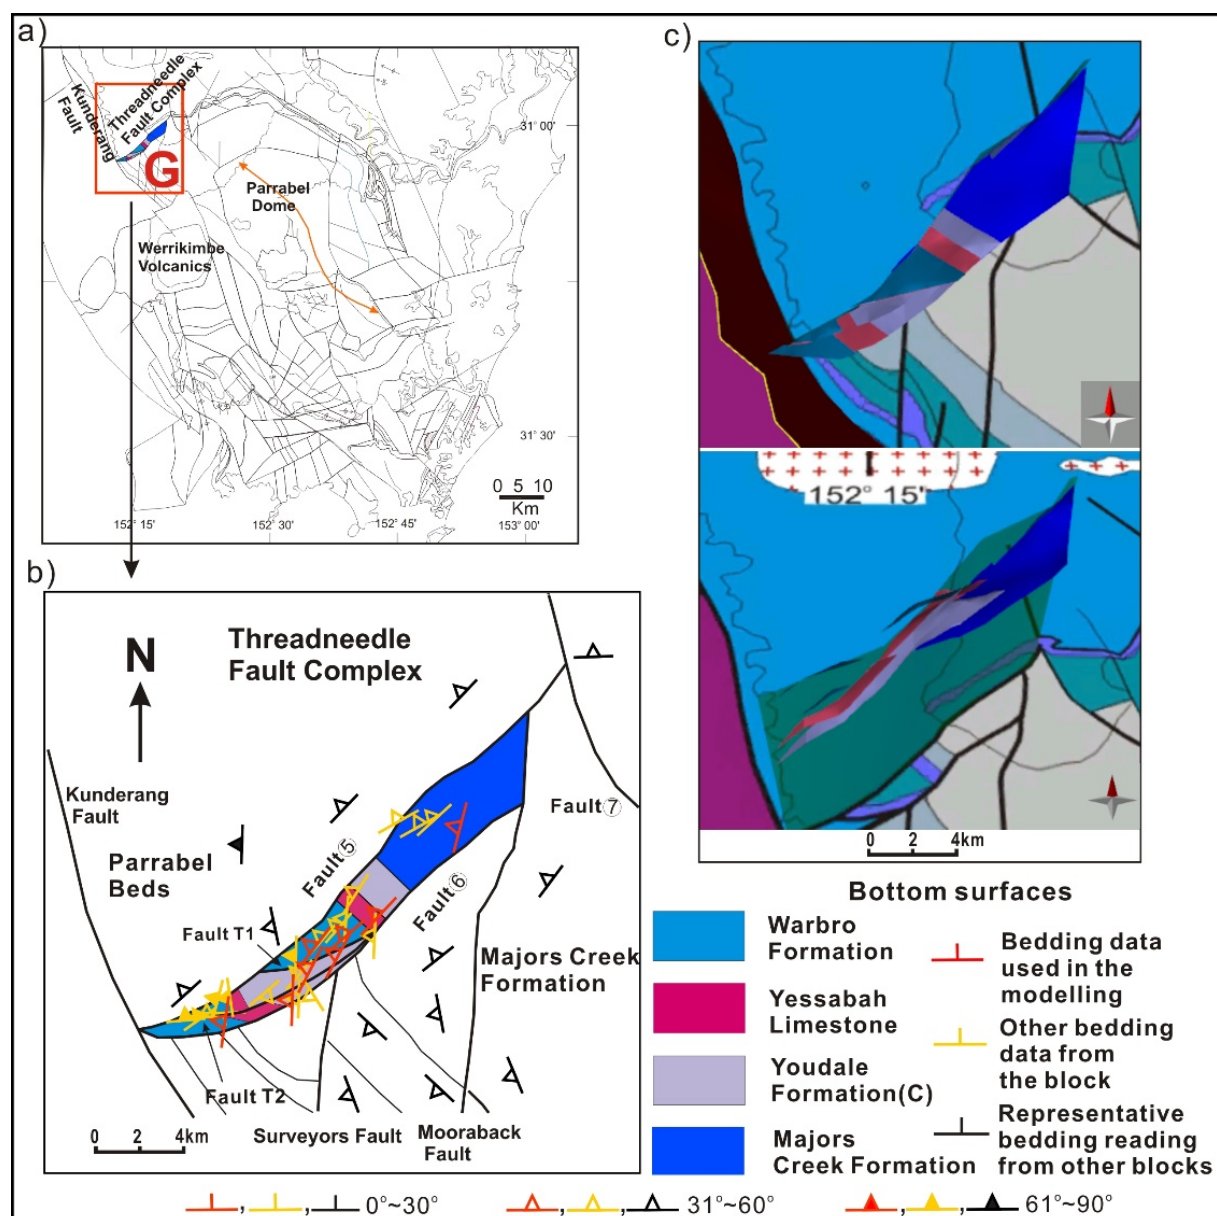

Figure A9. Fault Block G. (a) Locality map, (b) detailed map of the faulting and bedding readings within the various formations, the red symbols were readings used in the generation of the surfaces, and (c) 3D model of the formations in the fault block with the top down and inclined top down views.

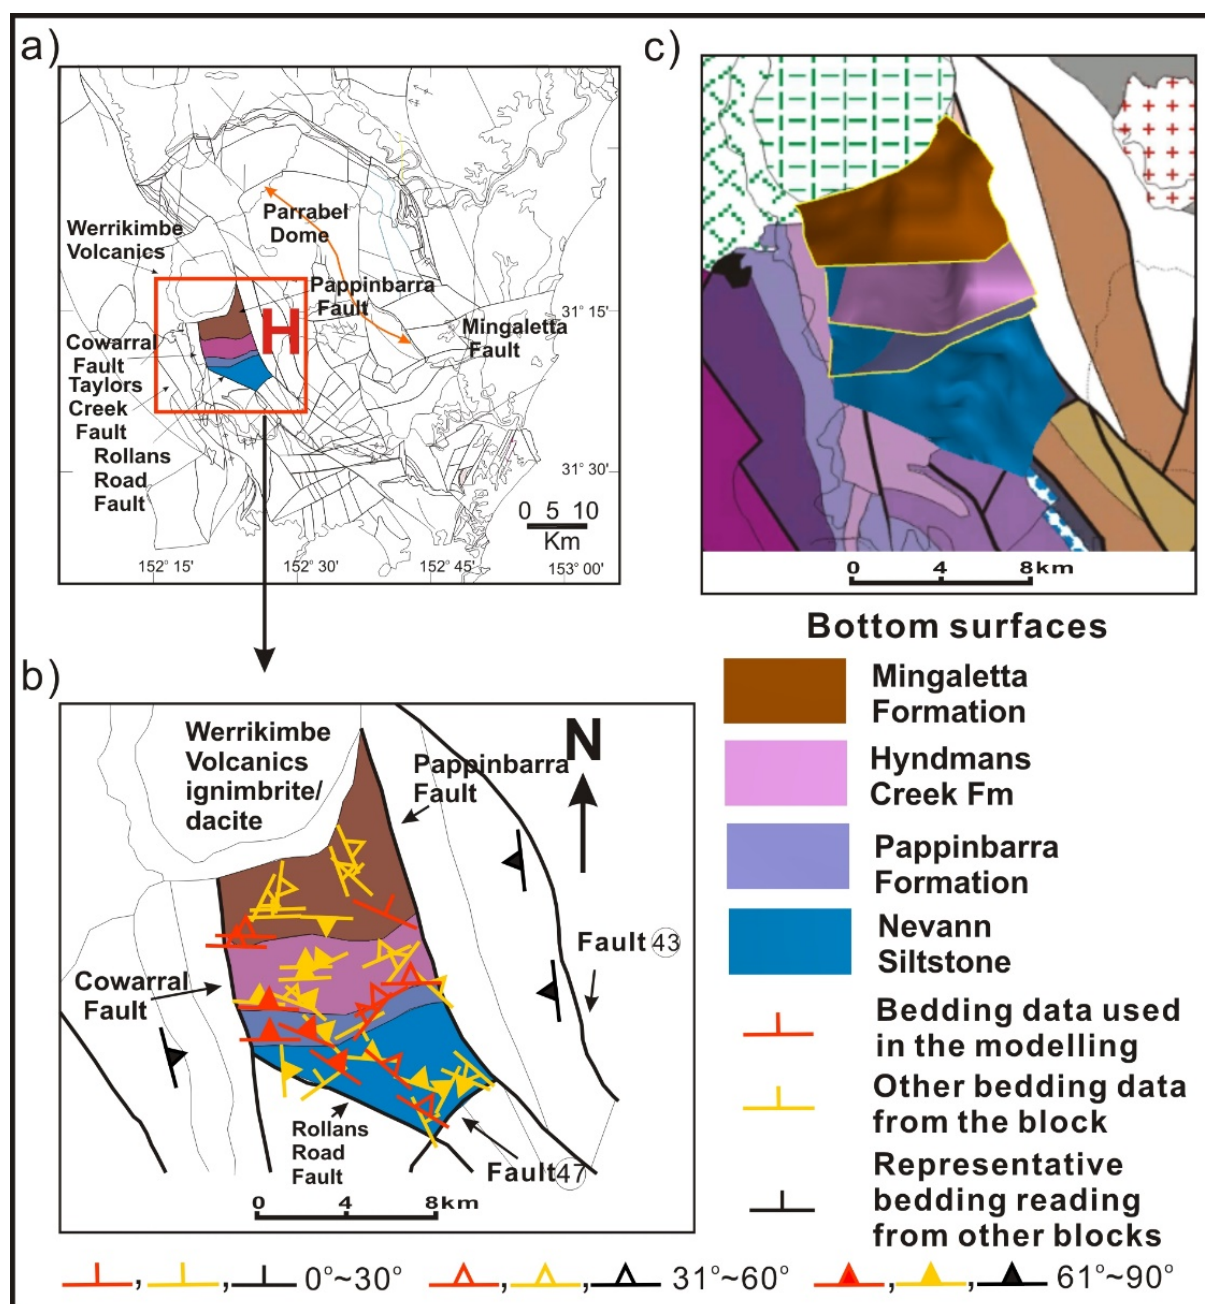

Figure A10. Fault Block H. (a) Locality map, (b) detailed map of the faulting and bedding readings within the various formations in this block, the red symbols were readings used in the generation of the computer surfaces for the formations, and (c) 3D model of base of the formations in the fault block.

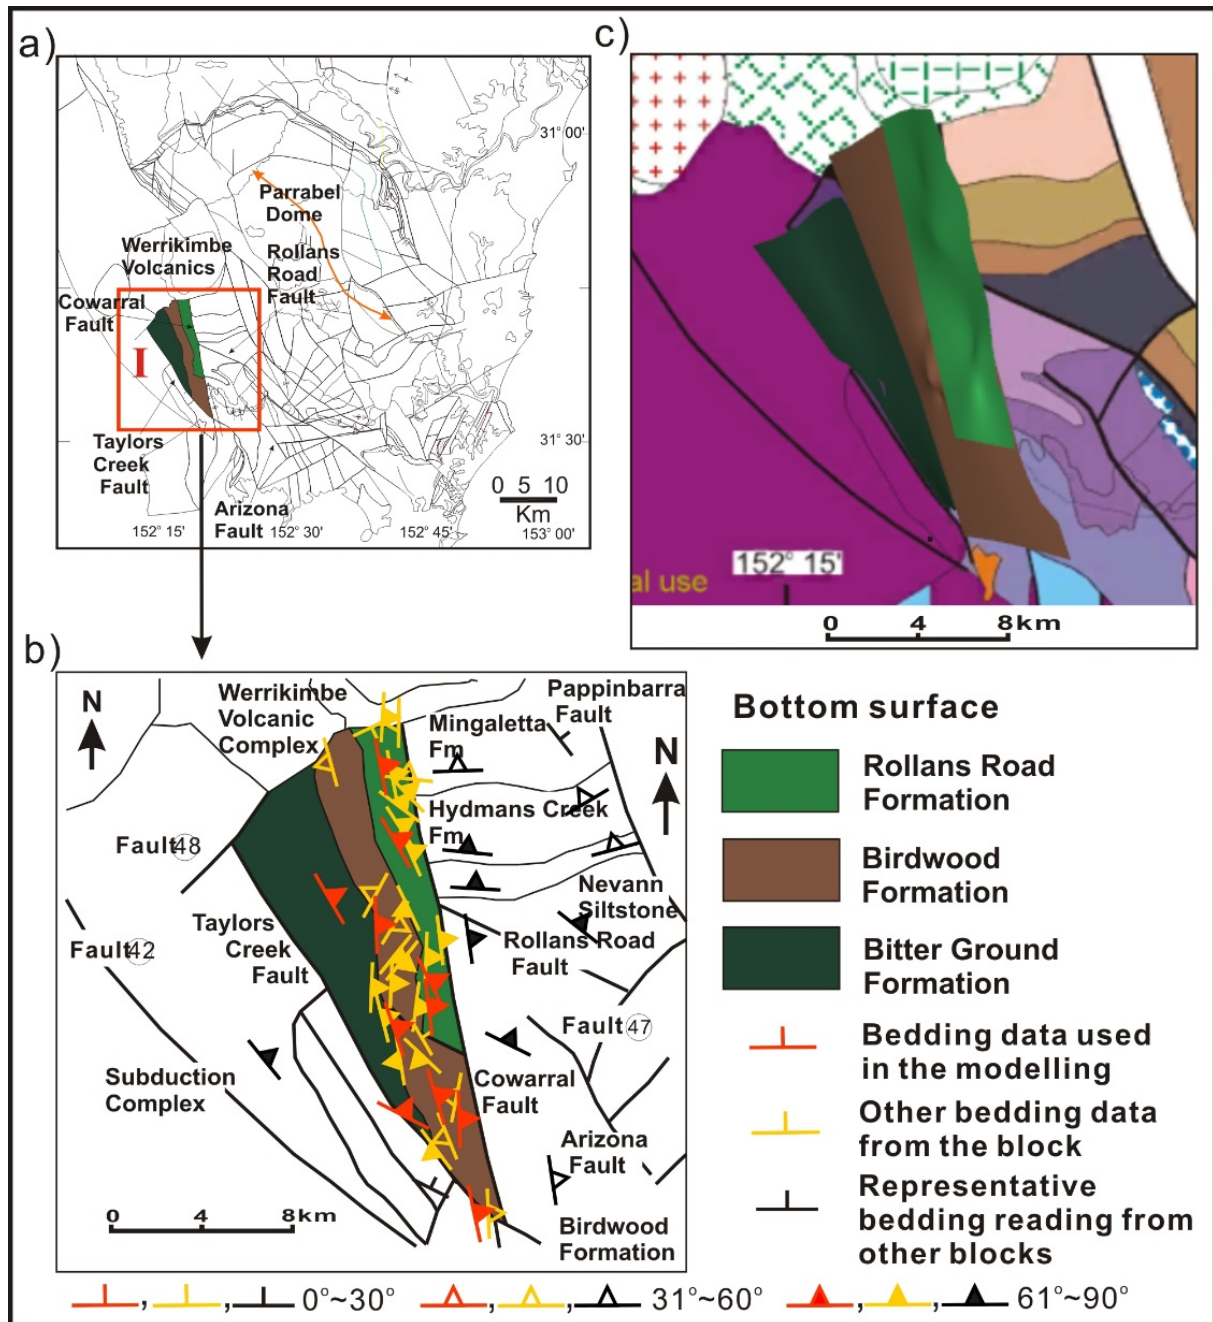

Figure A11. Fault Block I. (a) Locality map, (b) detailed map of the faulting and bedding readings within the various formations in this block, the red symbols were readings used in the generation of the computer surfaces for the formations, and (c) 3D model of base of the formations in the fault block.



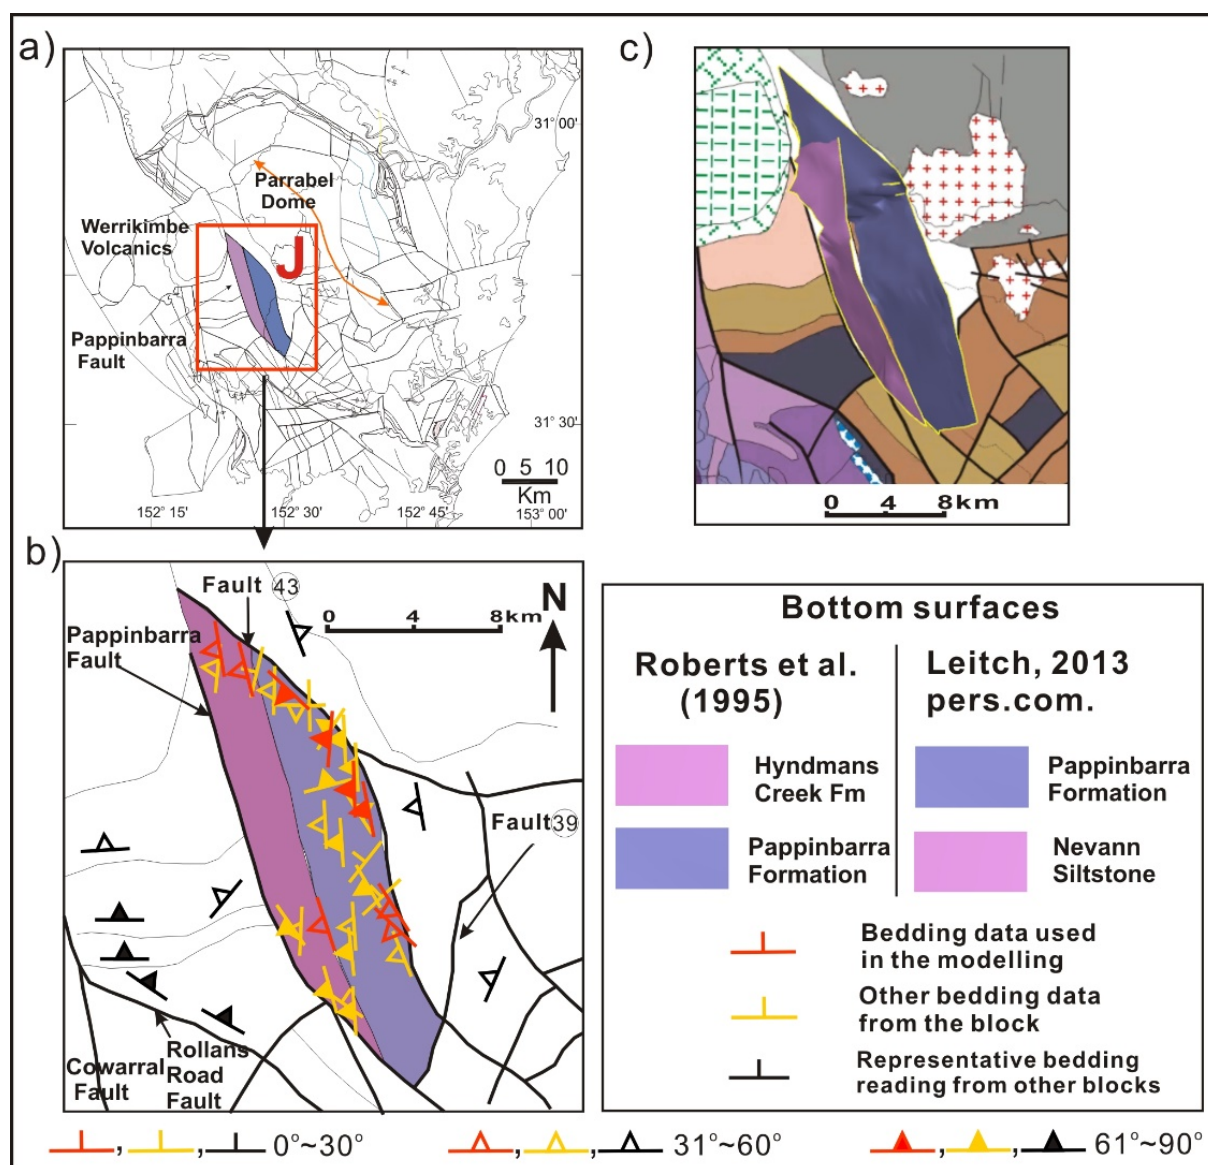

Figure A12. Fault Block J. (a) Locality map, (b) detailed map of the faulting and bedding readings within the various formations, the red symbols were readings used in the generation of the surfaces, and (c) 3D model of the formations in the fault block.

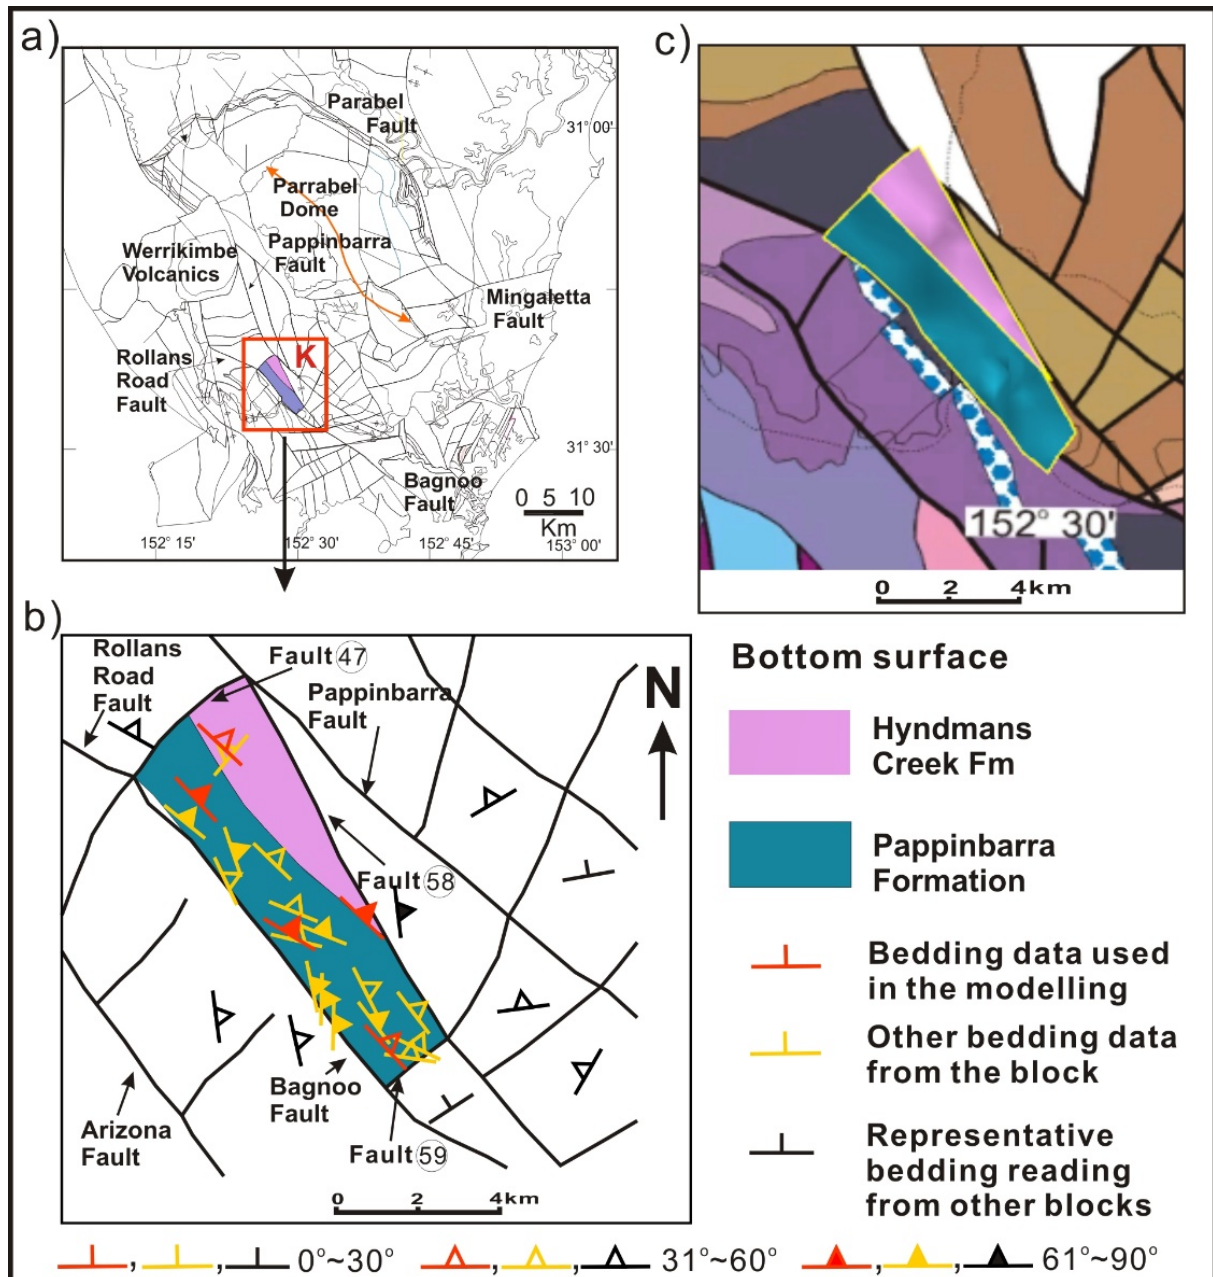

Figure A13. Fault Block K. (a) Locality map. (b) Detailed map of the faulting and bedding readings within the various formations in this block. The red bedding symbols were the readings used in the generation of the computer surfaces for the formations. (c) 3D model of the formations in the fault block.
